P4985

## Blunted heart rate reserve as an imaging-independent predictor of abnormal left ventricular contractile reserve

A. Zagatina<sup>1</sup>, T. Bombardini<sup>2</sup>, A. Djordjevic-Dikic<sup>3</sup>, H. Rodriguez-Zanella<sup>4</sup>, Q. Ciampi<sup>5</sup>, N. Gaibazzi<sup>6</sup>, K. Wierzbowska-Drabik<sup>7</sup>, I. Simova<sup>8</sup>, F. Lattanzi<sup>9</sup>, L. Cortigiani<sup>10</sup>, M. Haberka<sup>11</sup>, M. Ostojic<sup>2</sup>, T. Kovacevic Preradovic<sup>2</sup>, C. Carpegiani<sup>12</sup>, E. Picano<sup>12</sup>

<sup>1</sup> Saint Petersburg State University, Saint Petersburg, Russian Federation; <sup>2</sup> University Clinical Center of The Republic of Srpska, Banja Luka, Bosnia and Herzegovina; <sup>3</sup> Cardiology Clinic, Clinical Center of Serbia, Medical School, University of Belgrade, Belgrad, Serbia; <sup>4</sup> National Institute of Cardiology Ignacio Chavez, Mexico City, Mexico; <sup>5</sup> Fatebenefratelli Hospital of Benevento, Cardiology, Benevento, Italy; <sup>6</sup> University Hospital of Parma, Parma, Italy; <sup>7</sup> Medical University of Lodz, Lodz, Poland; <sup>8</sup> Acibadem City Clinic Cardiovascular Center, University Hospital, Sofia, Bulgaria; <sup>9</sup> Cisanello University Hospital, Cardiothoracic department, Pisa, Italy; <sup>10</sup> San Luca Hospital, Lucca, Italy; <sup>11</sup> Medical University of Silesia, Cardiology, Katowice, Poland; <sup>12</sup> Institute of Clinical Physiology (IFC), Pisa, Italy

On behalf of the Stress Echo 2020 study group of the Italian Society of Echocardiography and Cardiovascular Imaging (SIECVI)

**Background:** Stress echocardiography (SE) relies on regional wall motion and left ventricular contractile reserve (LVCR) based on force (systolic blood pressure/end-systolic volume). An additional non-imaging parameter based on EKG is the blunted heart rate reserve (HRR) which is a simple marker of altered autonomic balance and is associated with worse prognosis independently of ischemia.

**Aim:** To assess the relationship between HRR and LVCR in patients undergoing SE.

**Methods:** We enrolled 4707 patients (age 63.6±11.3 yrs, 2800 males) referred to SE for known or suspected coronary artery disease (CAD) and/or heart failure (HF) in 21 SE laboratories in 8 countries. The employed stress was exercise (n=2062), dipyridamole (n=2007) or dobutamine (n=638). We assessed LVCR (stress/rest ratio of force=systolic blood pressure/end-systolic volume, ESV). Stress-specific abnormal cutoff value of LVCR were <2.0 for exercise and dobutamine and <1.1 for dipyridamole. All readers had passed the upstream quality control reading for wall motion abnormalities and ESV. HR (with 12-lead ECG) was obtained each minute and

recorded at rest and peak stress. HR reserve (HRR) was calculated as the peak/rest HR ratio.

**Results:** HRR was related to LVCR at cumulative (n=4707; r=0.351; p<0.001: see figure) and stress-specific analysis for exercise (r=0.351; p<0.001), dipyridamole (r=0.241; p<0.001) and dobutamine (r=0.214; p<0.001). At multivariate logistic regression analysis, blunted HRR (optimal cutoff: 1.73 for exercise, 1.306 for dipyridamole, 1.932 for dobutamine) was a significant predictor of abnormal LVCR at stress-specific analysis for exercise (Odds ratio = 0.285, 95% Confidence Intervals: 0.149–0.546, p=0.0001), dobutamine (Odds ratio = 0.187, 95% Confidence Intervals: 0.057–0.617, p=0.0001) and dipyridamole (Odds ratio = 0.263, 95% Confidence Intervals: 0.115–0.602, p=0.002).

**Conclusion:** A blunted HRR is a useful non-imaging predictor of abnormal LVCR response during exercise or pharmacological SE. HRR is a simple biomarker of autonomic unbalance of physiologic and potentially prognostic meaning. A “slow heart” during stress (with blunted HRR) is more often a “weak heart”, with blunted increase in force.

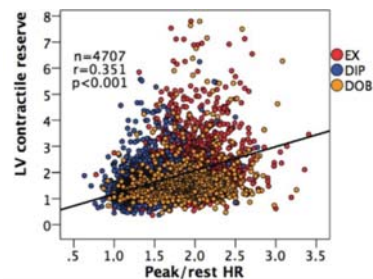

Source: http://academic.oup.com/eurheartj/article-pdf/40/Supplement_1/ehz746.0163/30199775/ehz746.0163.pdf
